# Supplementary material
Source: PubMed Central journal article supplement (PMC9793533)

# Survey domains

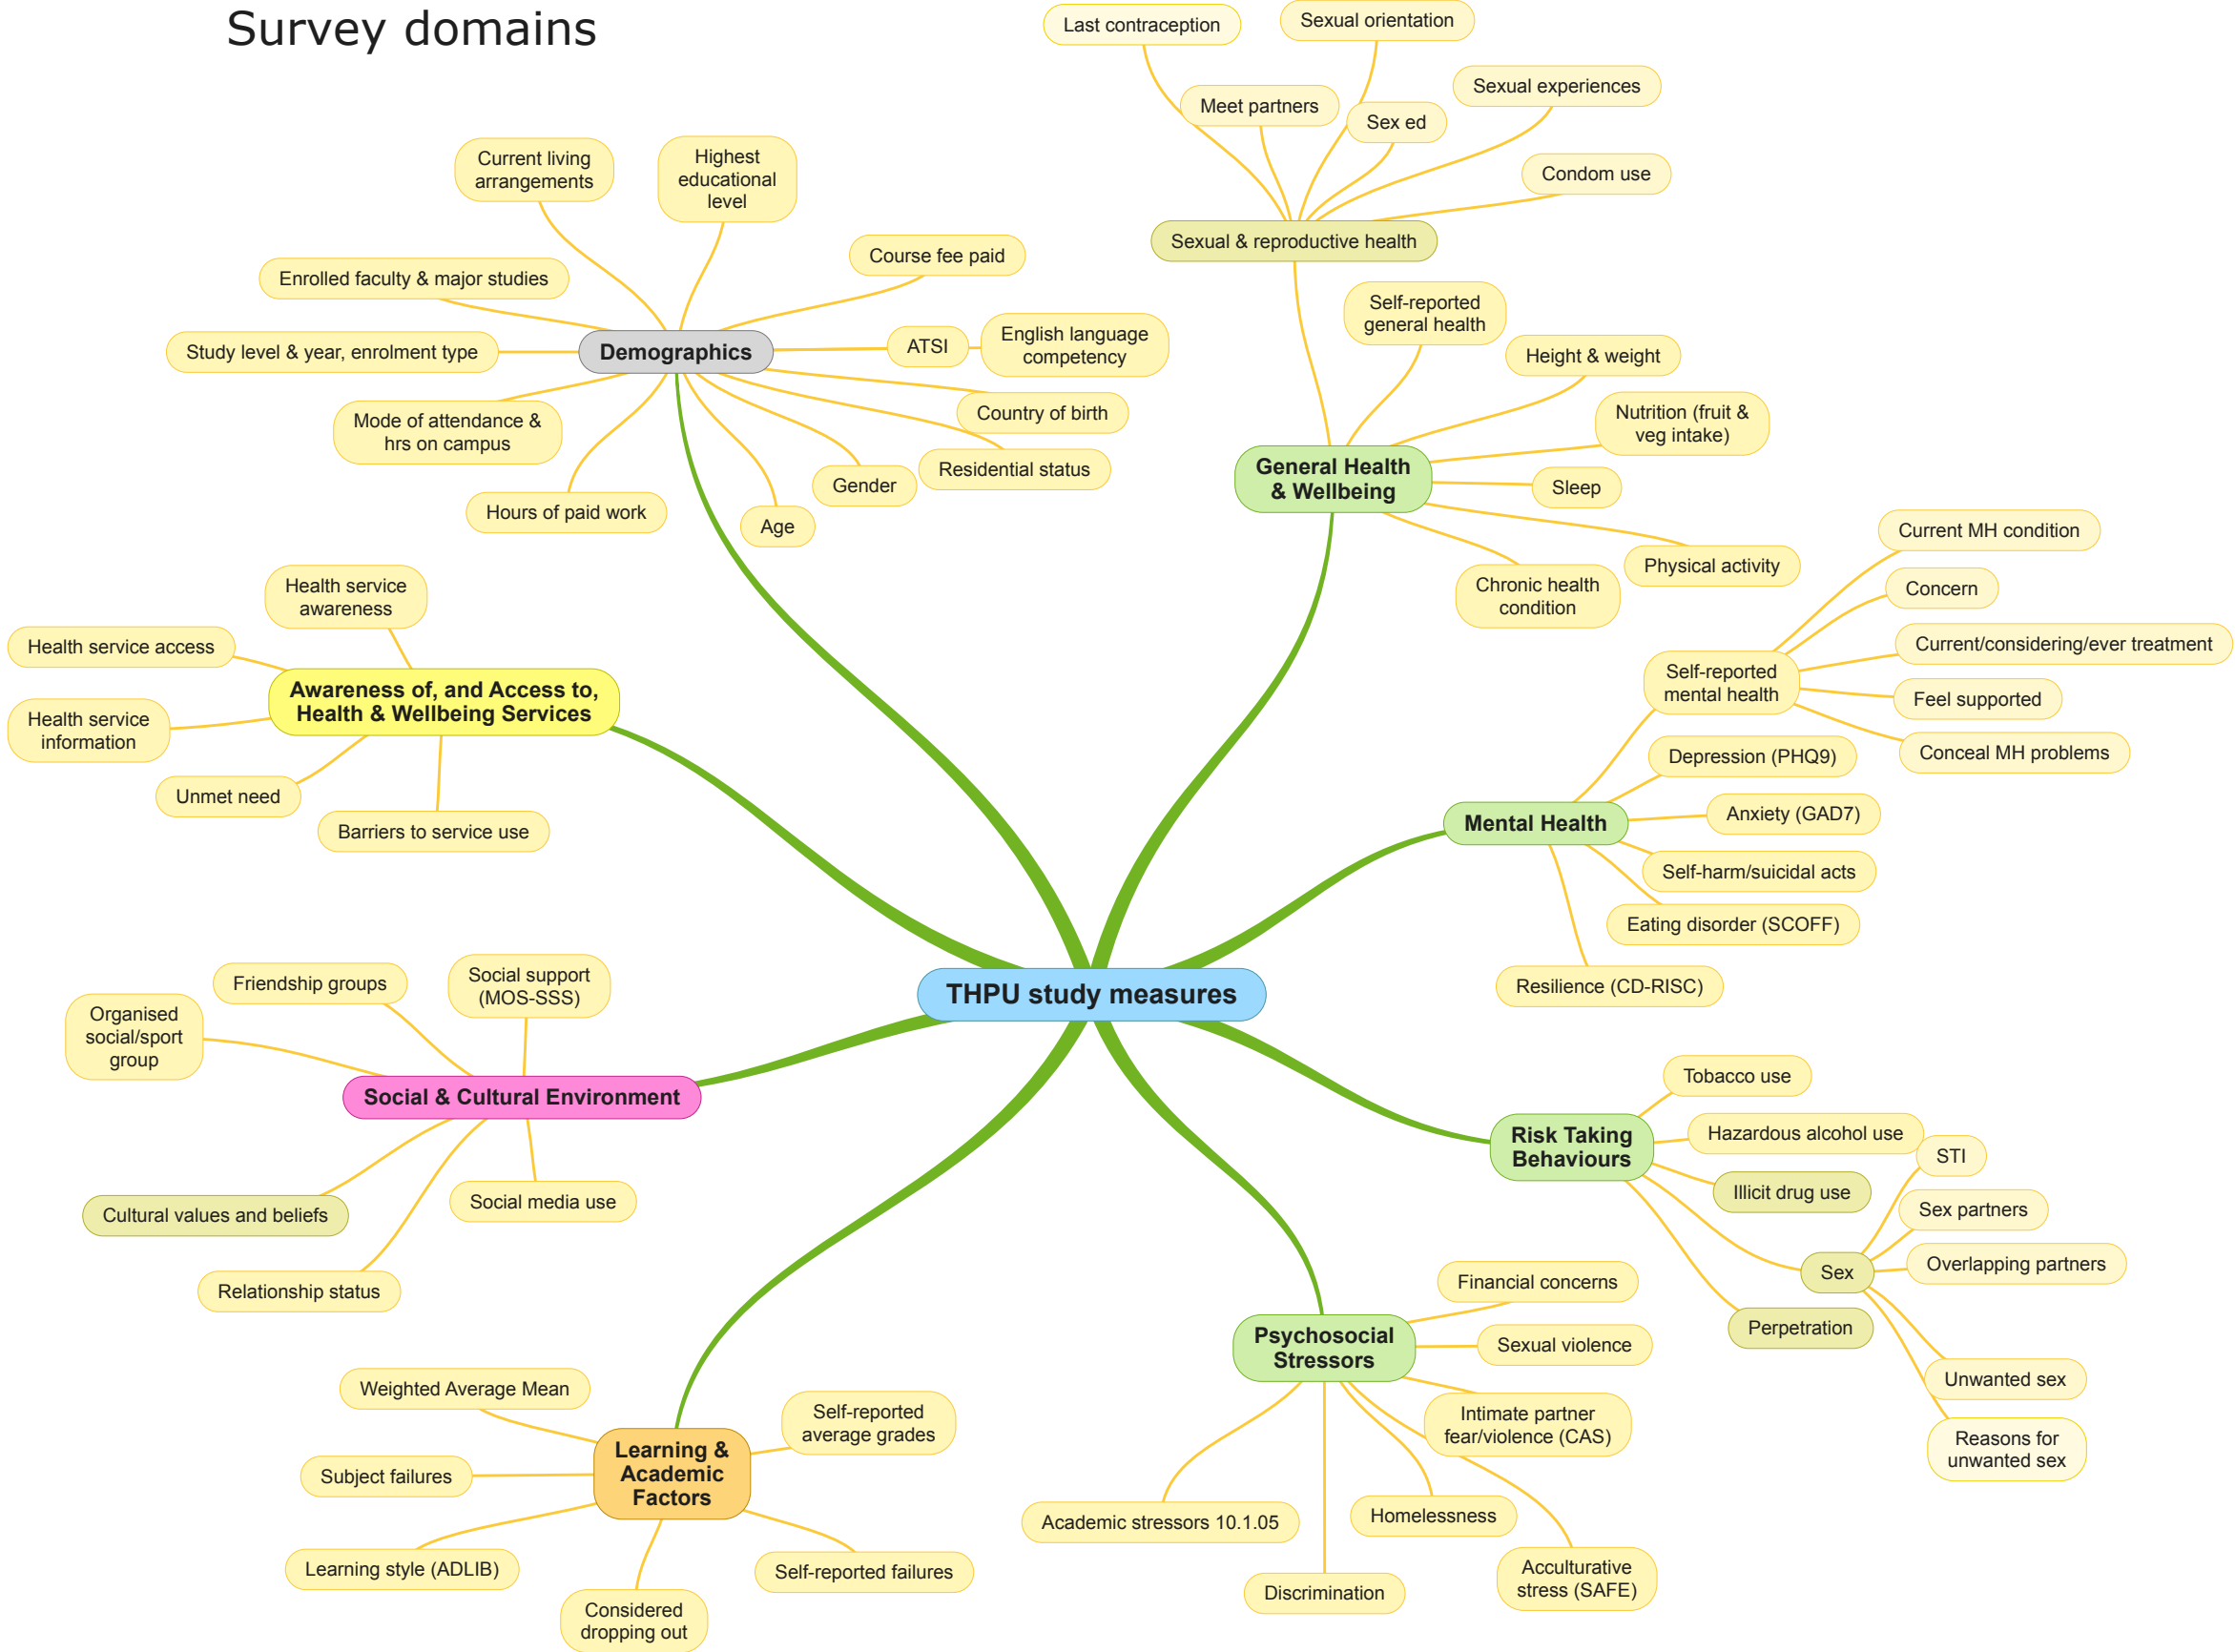

Supplement: 12889_2022_14690_MOESM4_ESM.pdf [file 12889_2022_14690_MOESM4_ESM.pdf]
